# Supplementary material
Source: publisher figshare collection journal article supplement (https://acs.figshare.com/ndownloader/files/27368986)
Supplement: Supplementary file 1 [file 27368986]

Compound_ID	SMILES	ALDH1A1 IC50/¦ÌM	CK2 IC50/nM	IC50/¦ÌM in A549	IC50/¦ÌM in A549/cDDP	IC50/¦ÌM in PC-3	IC50/¦ÌM in HepG2	IC50/¦ÌM in T24	IC50/¦ÌM in LO2
CX-4945	ClC1=CC=CC(NC2=NC3=C(C=CC(C(O)=O)=C3)C4=CN=CC=C42)=C1	1.69 ¡À 0.14	1.29 ¡À 0.098	22.39 ¡À 2.04	25.08 ¡À 2.34	19.10 ¡À 1.75	29.50 ¡À 2.74	32.06 ¡À 3.01	22.98 ¡À 2.05
HY1	NNC(C1=CC(N=C(NC2=CC(Cl)=CC=C2)C3=C4C=NC=C3)=C4C=C1)=O	0.09 ¡À 0.01	0.715 ¡À 0.13	18.16 ¡À 2.21	17.03 ¡À 1.02	15.24 ¡À 1.46	29.64 ¡À 2.75	27.09 ¡À 2.53	24.74 ¡À 2.28
HY1-Pt	[NH3][Pt]([NH3])(OC1=O)OC(C12C/C(C2)=N\NC(C3=CC(N=C(NC4=CC(Cl)=CC=C4)C5=C6C=NC=C5)=C6C=C3)=O)=O		1.14 ¡À 0.236	5.10 ¡À 0.48	4.84 ¡À 1.38	5.48 ¡À 0.361	12.98 ¡À 1.65	5.71 ¡À 0.39	31.78 ¡À 3.01
Cisplatin	[NH3][Pt]([NH3])(Cl)Cl			4.05 ¡À 0.30	28.12 ¡À 1.71
DN604	[NH3][Pt]([NH3])(OC1=O)OC(C12CC(C2)=O)=O			16.93 ¡À 1.35	48.56¡À4.60
A physical mixture of equimolar DN604 and HY1				16.76¡À1.32	18.90¡À1.65
